# Supplementary material
Source: MDPI journal article supplement (https://www.mdpi.com/2297-8739/5/1/19)
Supplement: s1 [file s1]

**Table S1.** Experimental retention data,  $t_R$  (exp) in min, of test solutes obtained on the Kinetex 5 $\mu$ m EVO C18 column and under isocratic and linear gradient conditions in different eluent pHs modified with ACN or MeOH.

| Eluent pH 2 modified with ACN |                                            |       |       |              |                                                                                                                     |          |       |            |
|-------------------------------|--------------------------------------------|-------|-------|--------------|---------------------------------------------------------------------------------------------------------------------|----------|-------|------------|
| solutes                       | isocratic runs with different $\phi_{ACN}$ |       |       |              | linear $\phi_{ACN}$ -gradients from $\phi_0 = 0.3$ to $\phi_f = 0.5$ with different gradient durations, $t_G$ (min) |          |       |            |
|                               | 0.3                                        | 0.4   | 0.5   | 0.37 (opt.)  | 2.5                                                                                                                 | 5        | 10    | 6.5 (opt.) |
| p-CA                          | 2.175                                      | 2.054 | 1.943 | 2.094        | 2.164                                                                                                               | 2.174    | 2.175 | 2.245      |
| p-BA                          | 2.596                                      | 2.356 | 2.124 | 2.427        | 2.557                                                                                                               | 2.587    | 2.588 | 2.698      |
| 3-BP                          | 7.038                                      | 3.861 | 2.613 | 4.450        | 4.238                                                                                                               | 4.963    | 5.638 | 5.326      |
| 2B-4NP                        | 7.912                                      | 3.997 | 2.613 | 4.692        | 4.319                                                                                                               | 5.145    | 5.971 | 5.578      |
| B                             | 8.951                                      | 5.246 | 3.443 | 5.991        | 4.963                                                                                                               | 5.920    | 6.887 | 6.413      |
| 4B-2NP                        | 12.75                                      | 6.051 | 3.549 | 7.259        | 5.336                                                                                                               | 6.463    | 7.984 | 7.168      |
| 2,4-DBP                       | 15.27                                      | 6.298 | 3.534 | 7.773        | 5.336                                                                                                               | 6.604    | 8.357 | 7.380      |
| T                             | 16.73                                      | 8.065 | 4.571 | 9.675        | 6.263                                                                                                               | 7.440    | 9.444 | 8.296      |
| Eluent pH 3 modified with ACN |                                            |       |       |              |                                                                                                                     |          |       |            |
| solutes                       | isocratic runs with different $\phi_{ACN}$ |       |       |              | linear $\phi_{ACN}$ -gradients from $\phi_0 = 0.3$ to $\phi_f = 0.5$ with different gradient durations, $t_G$ (min) |          |       |            |
|                               | 0.3                                        | 0.4   | 0.5   | 0.365 (opt.) | 5                                                                                                                   | 10       | 20    | 6.5 (opt.) |
| p-CA                          | 4.118                                      | 3.060 | 2.376 | 3.373        | 3.806                                                                                                               | 3.957    | 4.027 | 3.846      |
| p-BA                          | 5.074                                      | 3.463 | 2.557 | 3.926        | 4.370                                                                                                               | 4.671    | 4.863 | 4.470      |
| 3-BP                          | 7.148                                      | 3.906 | 2.638 | 4.711        | 5.045                                                                                                               | 5.759    | 6.333 | 5.296      |
| 2B-4NP                        | 8.004                                      | 4.032 | 2.617 | 4.983        | 5.216                                                                                                               | 6.081    | 6.826 | 5.528      |
| B                             | 9.091                                      | 5.296 | 3.458 | 6.333        | 6.001                                                                                                               | 7.018    | 7.853 | 6.373      |
| 4B-2NP                        | 12.95                                      | 6.131 | 3.584 | 7.803        | 6.545                                                                                                               | 8.115    | 9.665 | 7.108      |
| 2,4-DBP                       | 15.52                                      | 6.393 | 3.564 | 8.437        | 6.686                                                                                                               | 8.487    | 10.43 | 7.320      |
| T                             | 17.02                                      | 8.155 | 4.596 | 10.40        | 7.531                                                                                                               | 9.575    | 11.76 | 8.226      |
| Eluent pH 5 modified with ACN |                                            |       |       |              |                                                                                                                     |          |       |            |
| solutes                       | isocratic runs with different $\phi_{ACN}$ |       |       |              | linear $\phi_{ACN}$ -gradients from $\phi_0 = 0.3$ to $\phi_f = 0.5$ with different gradient durations, $t_G$ (min) |          |       |            |
|                               | 0.3                                        | 0.4   | 0.5   | 0.365 (opt.) | 2.5                                                                                                                 | 5 (opt.) | 10    |            |
| 2B-4NP                        | 5.105                                      | 3.057 | 2.336 | 3.363        | 3.705                                                                                                               | 4.118    | 4.480 |            |
| p-CA                          | 5.382                                      | 3.403 | 2.550 | 3.846        | 3.926                                                                                                               | 4.379    | 4.772 |            |
| p-BA                          | 6.388                                      | 3.790 | 2.648 | 4.356        | 4.198                                                                                                               | 4.812    | 5.356 |            |
| 3-BP                          | 7.199                                      | 3.901 | 2.608 | 4.621        | 4.289                                                                                                               | 5.014    | 5.709 |            |
| B                             | 9.132                                      | 5.306 | 3.458 | 6.212        | 5.014                                                                                                               | 5.970    | 6.957 |            |
| 4B-2NP                        | 11.93                                      | 5.762 | 3.443 | 7.048        | 5.185                                                                                                               | 6.313    | 7.722 |            |
| 2,4-DBP                       | 15.69                                      | 6.384 | 3.880 | 8.206        | 5.407                                                                                                               | 6.655    | 8.447 |            |
| T                             | 17.14                                      | 8.175 | 4.581 | 10.16        | 6.333                                                                                                               | 7.511    | 9.544 |            |

| Eluent pH 7 modified with ACN |                                               |       |       |             |                                                                                                                                 |       |       |          |
|-------------------------------|-----------------------------------------------|-------|-------|-------------|---------------------------------------------------------------------------------------------------------------------------------|-------|-------|----------|
| solutes                       | isocratic runs with different $\varphi_{ACN}$ |       |       |             | linear $\varphi_{ACN}$ -gradients from $\varphi_0 = 0.3$ to $\varphi_f = 0.5$<br>with different gradient durations, $t_G$ (min) |       |       |          |
|                               | 0.3                                           | 0.4   | 0.5   | 0.37 (opt.) | 2.5                                                                                                                             | 5     | 10    | 6 (opt.) |
| 2B-4NP                        | 1.980                                         | 1.656 | 1.596 | 1.702       | 1.953                                                                                                                           | 1.963 | 1.963 | 1.963    |
| 4B-2NP                        | 3.366                                         | 2.306 | 1.827 | 2.426       | 2.960                                                                                                                           | 3.111 | 3.191 | 3.141    |
| p-CA                          | 5.356                                         | 3.392 | 2.467 | 3.765       | 3.906                                                                                                                           | 4.380 | 4.762 | 4.470    |
| p-BA                          | 6.343                                         | 3.770 | 2.648 | 4.259       | 4.168                                                                                                                           | 4.803 | 5.357 | 4.933    |
| 3-BP                          | 7.050                                         | 3.916 | 2.628 | 4.480       | 4.248                                                                                                                           | 4.984 | 5.689 | 5.155    |
| B                             | 9.041                                         | 5.346 | 3.443 | 6.051       | 4.973                                                                                                                           | 5.951 | 6.957 | 6.202    |
| 2,4-DBP                       | 13.81                                         | 6.056 | 3.443 | 7.309       | 5.185                                                                                                                           | 6.444 | 8.055 | 6.816    |
| T                             | 16.92                                         | 8.225 | 4.591 | 9.806       | 6.262                                                                                                                           | 7.491 | 9.525 | 7.934    |

| Eluent pH 9 modified with ACN |                                               |       |  |  |                                                                                                                                 |       |  |  |
|-------------------------------|-----------------------------------------------|-------|--|--|---------------------------------------------------------------------------------------------------------------------------------|-------|--|--|
| solutes                       | isocratic runs with different $\varphi_{ACN}$ |       |  |  | linear $\varphi_{ACN}$ -gradients from $\varphi_0 = 0.3$ to $\varphi_f = 0.5$<br>with different gradient durations, $t_G$ (min) |       |  |  |
|                               | 0.3                                           | 0.4   |  |  | 10                                                                                                                              | 20    |  |  |
| 2B-4NP                        | 1.682                                         | 1.294 |  |  | 1.682                                                                                                                           | 1.701 |  |  |
| 4B-2NP                        | 1.833                                         | 1.621 |  |  | 1.822                                                                                                                           | 1.862 |  |  |
| 3-BP                          | 4.701                                         | 2.315 |  |  | 4.138                                                                                                                           | 4.782 |  |  |
| p-CA                          | 5.291                                         | 3.332 |  |  | 4.732                                                                                                                           | 4.963 |  |  |
| 2,4-DBP                       | 6.004                                         | 3.544 |  |  | 5.104                                                                                                                           | 5.608 |  |  |
| p-BA                          | 6.258                                         | 3.705 |  |  | 5.316                                                                                                                           | 5.700 |  |  |
| B                             | 8.941                                         | 5.195 |  |  | 6.916                                                                                                                           | 7.702 |  |  |
| T                             | 16.71                                         | 7.984 |  |  | 9.494                                                                                                                           | 11.56 |  |  |

| Eluent pH 3 modified with MeOH |                                                |       |       |              |                                                                                                                                  |       |       |           |
|--------------------------------|------------------------------------------------|-------|-------|--------------|----------------------------------------------------------------------------------------------------------------------------------|-------|-------|-----------|
| solutes                        | isocratic runs with different $\varphi_{MeOH}$ |       |       |              | linear $\varphi_{MeOH}$ -gradients from $\varphi_0 = 0.4$ to $\varphi_f = 0.6$<br>with different gradient durations, $t_G$ (min) |       |       |           |
|                                | 0.4                                            | 0.5   | 0.6   | 0.575 (opt.) | 5                                                                                                                                | 10    | 15    | 20 (opt.) |
| p-CA                           | 3.856                                          | 2.839 | 2.185 | 2.330        | 3.584                                                                                                                            | 3.705 | 3.765 | 3.806     |
| p-BA                           | 4.798                                          | 3.252 | 2.366 | 2.557        | 4.158                                                                                                                            | 4.450 | 4.561 | 4.631     |
| 3-BP                           | 8.715                                          | 4.576 | 2.839 | 3.164        | 5.578                                                                                                                            | 6.564 | 7.088 | 7.410     |
| B                              | 8.947                                          | 5.372 | 3.458 | 3.867        | 5.951                                                                                                                            | 7.050 | 7.551 | 7.863     |
| 2B-4NP                         | 9.991                                          | 5.120 | 3.070 | 3.461        | 6.031                                                                                                                            | 7.138 | 7.793 | 8.205     |
| 4B-2NP                         | 14.80                                          | 7.260 | 4.047 | 4.639        | 7.088                                                                                                                            | 8.980 | 10.08 | 10.83     |
| 2,4-DBP                        | 23.96                                          | 9.716 | 4.711 | 5.569        | 8.035                                                                                                                            | 10.60 | 12.45 | 13.79     |
| T                              | 18.95                                          | 9.444 | 5.115 | 5.932        | 8.095                                                                                                                            | 10.40 | 11.91 | 12.95     |
